# Supplementary material
Source: MDPI journal article supplement (https://www.mdpi.com/2071-1050/11/11/3129)
Supplement: s1 [file s1]

## Supplementary Materials

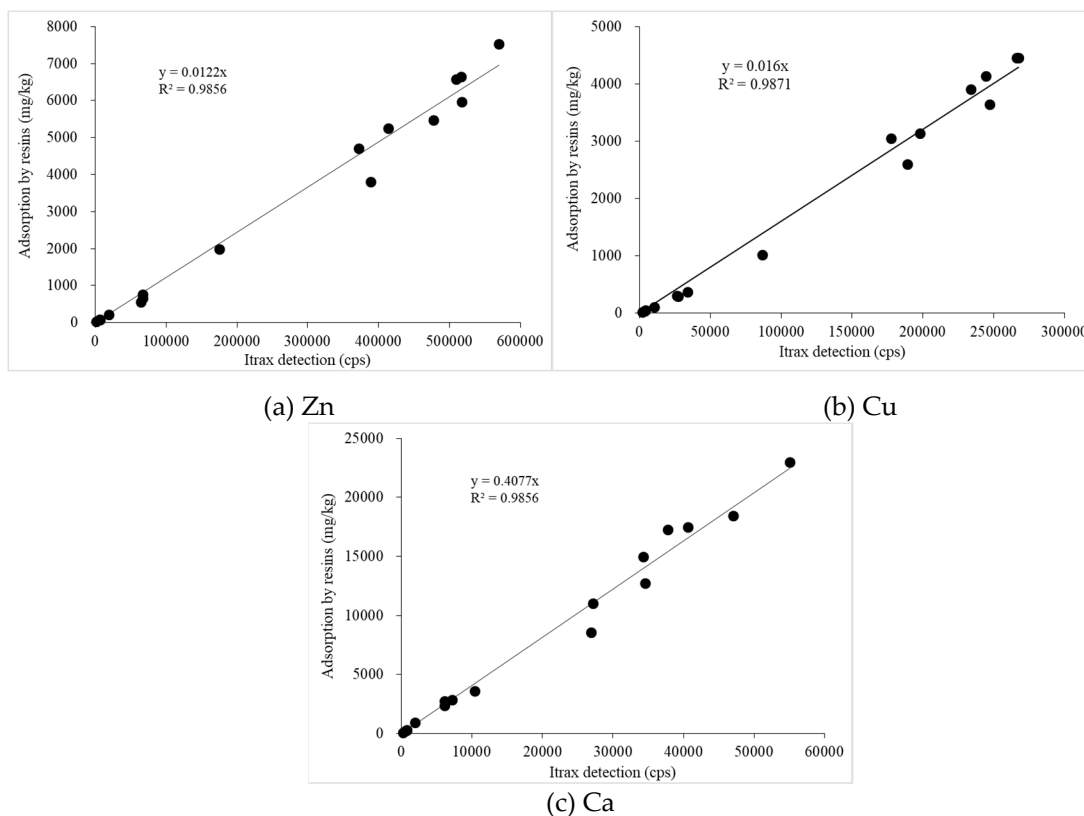

**Figure S1.** Relationship between resin adsorption and Itrax XRF-CS detection values. Note: cps denotes count per second.

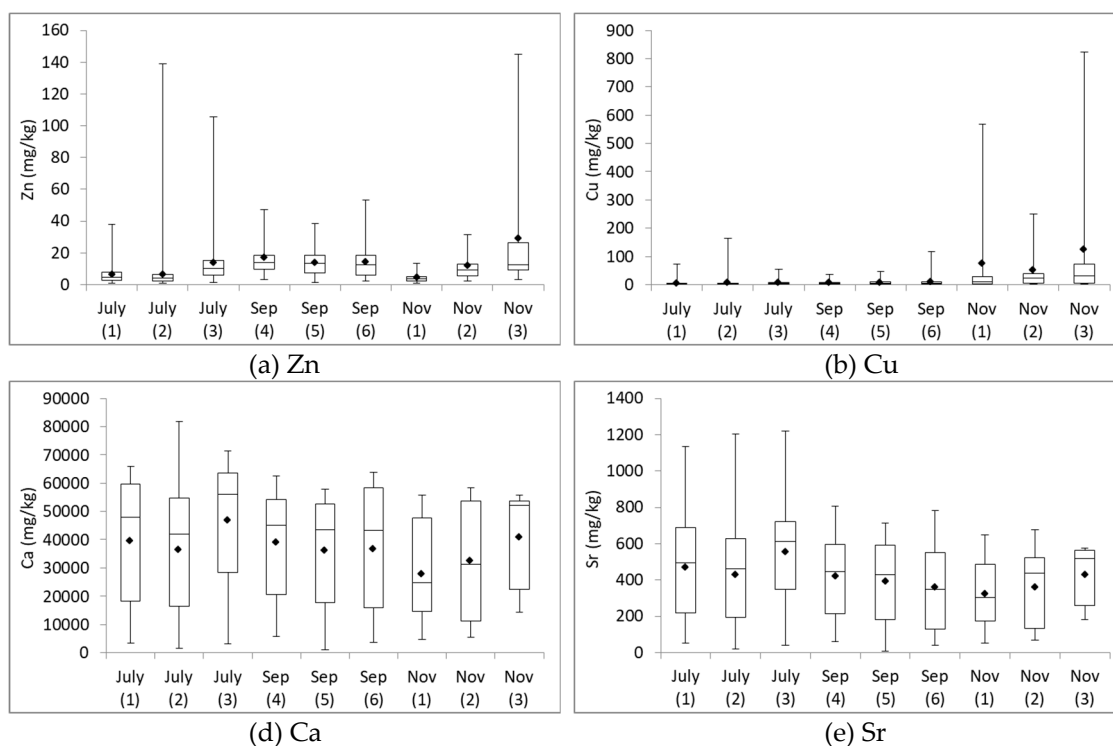

**Figure S2.** Concentration of metal and trace elements in resins collected during different sampling periods. Note: July (1), July (2), and July (3) denotes three recycling procedures on July 28<sup>th</sup>-29<sup>th</sup>, August 4<sup>th</sup>-5<sup>th</sup>, and August 11<sup>th</sup>-12<sup>th</sup>, respectively; Sep (4), Sep (5), and Sep (6) denotes three recycling procedures on September 30<sup>th</sup>, October 7<sup>th</sup>, and October 14<sup>th</sup>, respectively; Nov (1), Nov (2), and Nov (3) denotes three recycling procedures on November 4<sup>th</sup>, 11<sup>th</sup> and 18<sup>th</sup>, respectively.
